# Supplementary material
Source: publisher figshare collection journal article supplement (https://tandf.figshare.com/articles/dataset/_/1632781)
Supplement: Supplementary file 1 [file 2]

Peregrine Falcon Egg Pollutants  
Mirror Stockholm POPs List Including Methyl Mercury

Simon Schwarz<sup>1</sup>, Anthony Rackstraw<sup>2</sup>, Peter A. Behnisch<sup>3</sup>, Abraham Brouwer<sup>4</sup>, Heinz-R. Köhler<sup>5</sup>, Alexander Kotz<sup>6</sup>, Thomas Kuballa<sup>7</sup>, Rainer Malisch<sup>8</sup>, Frank Neugebauer<sup>9</sup>, Friedrich Schilling<sup>7</sup>, Daniel Schmidt<sup>8</sup>, K. Theo von der Trenck<sup>9</sup>

Online Table 1B: List of Aeries, Highly Polluted Eggs and Conurbations Omitted

| Jahr | Standort-nummer | Gemeinde                 | Brut-platz | Landkreis/Stadtkreis | Höhen-bereich Unter-grenze [m] | Höhen-bereich Ober-grenze [m] | Höhe über NN Bereichs-mittel [m] | DDE [µg/g TS] | Standort-nummer | PCB-138 [µg/g TS] | PCB-153 [µg/g TS] | PCB-180 [µg/g TS] | Summe PCB (138, 153, 180) [µg/g TS] | Höhe genau bzw Bereichsmittel |
|------|-----------------|--------------------------|------------|----------------------|--------------------------------|-------------------------------|----------------------------------|---------------|-----------------|-------------------|-------------------|-------------------|-------------------------------------|-------------------------------|
| 2001 | 61-013          | Oberried (Kirchzarten)   | F          | FR                   | 430                            | 1280                          | 855                              | 12,2          | 61-013          | 1,548             | 3,684             | 2,548             | 7,8                                 | 855                           |
| 2001 | 61-018          | Eberbach                 | F          | MOS                  | 130                            | 500                           | 315                              | 5,4           | 61-018          | 1,149             | 2,732             | 1,971             | 5,9                                 | 315                           |
| 2001 | 61-031          | Breitnau                 |            | FR                   | 940                            | 1490                          | 1215                             | 14,2          | 61-031          | 2,698             | 6,253             | 3,551             | 12,5                                | 1215                          |
| 2001 | 61-031          | Breitnau                 |            | FR                   | 940                            | 1490                          | 1215                             | 16,6          | 61-031          | 3,381             | 7,809             | 4,421             | 15,6                                | 1215                          |
| 2001 | 61-035          | Schwäbisch Hall          |            | SHA                  | 270                            | 510                           | 390                              | 3,2           | 61-035          | 0,343             | 0,638             | 0,879             | 1,9                                 | 390                           |
| 2001 | 61-035          | Schwäbisch Hall          |            | SHA                  | 270                            | 510                           | 390                              | 14,2          | 61-035          | 1,121             | 2,975             | 4,529             | 8,6                                 | 390                           |
| 2001 | 61-036          | Aalen                    |            | AA                   | 377                            | 760                           | 569                              | 4,7           | 61-036          | 1,181             | 1,168             | 1,473             | 3,8                                 | 569                           |
| 2001 | 61-039          | Schelklingen             | F          | UL                   | 530                            | 730                           | 630                              | 2,1           | 61-039          | 0,372             | 1,063             | 1,239             | 2,7                                 | 590                           |
| 2001 | 61-039          | Schelklingen             | F          | UL                   | 530                            | 730                           | 630                              | 1,5           | 61-039          | 0,234             | 0,725             | 0,764             | 1,7                                 | 590                           |
| 2001 | 61-039          | Schelklingen             | F          | UL                   | 530                            | 730                           | 630                              | 1,3           | 61-039          | 0,485             | 0,571             | 0,701             | 1,8                                 | 590                           |
| 2001 | 61-040          | Freiburg                 |            | FR                   | 320                            | 1280                          | 800                              | 10,3          | 61-040          | 0,797             | 1,399             | 0,86              | 3,1                                 | 800                           |
| 2001 | 61-040          | Freiburg                 |            | FR                   | 320                            | 1280                          | 800                              | 8,8           | 61-040          | 0,683             | 1,187             | 0,693             | 2,6                                 | 800                           |
| 2001 | 61-040          | Freiburg                 |            | FR                   | 320                            | 1280                          | 800                              | 37,5          | 61-040          | 3,297             | 6,048             | 3,628             | 13,0                                | 800                           |
| 2001 | 61-042          | Neckarwestheim           |            | LB                   | 170                            | 390                           | 280                              | 18,8          | 61-042          | 5,104             | 8,425             | 0,033             | 13,6                                | 280                           |
| 2001 | 61-044          | Zimmern ob Rotweil       | B          | RW                   | 590                            | 720                           | 655                              | 9,4           | 61-044          | 2,059             | 3,441             | 1,828             | 7,3                                 | 671                           |
| 2001 | 61-045          | Rotweil-Villingendorf    | B          | RW                   | 510                            | 730                           | 620                              | 7,0           | 61-045          | 0,701             | 2,026             | 1,597             | 4,3                                 | 620                           |
| 2001 | 61-045          | Rotweil-Villingendorf    | B          | RW                   | 510                            | 730                           | 620                              | 11,2          | 61-045          | 0,876             | 2,446             | 1,736             | 5,1                                 | 620                           |
| 2001 | 61-048          | Badenweiler              | F          | FR                   | 300                            | 1170                          | 735                              | 23,3          | 61-048          | 2,293             | 7,598             | 6,618             | 16,5                                | 735                           |
| 2001 | 61-048          | Badenweiler              | F          | FR                   | 300                            | 1170                          | 735                              | 23,6          | 61-048          | 2,188             | 8,821             | 6,398             | 17,4                                | 735                           |
| 2001 | 61-050          | Feldberg                 | F          | FR                   | 110                            | 1490                          | 800                              | 30,5          | 61-050          | 2,144             | 6,793             | 4,451             | 13,4                                | 800                           |
| 2001 | 61-050          | Feldberg                 | F          | FR                   | 110                            | 1490                          | 800                              | 12,2          | 61-050          | 1,458             | 3,684             | 2,548             | 7,7                                 | 800                           |
| 2001 | 61-050          | Feldberg                 | F          | FR                   | 110                            | 1490                          | 800                              | 10,8          | 61-050          | 1,498             | 3,053             | 2,221             | 6,8                                 | 800                           |
| 2001 | 61-051          | Baden                    |            | BAD                  | 130                            | 570                           | 350                              | 4,9           | 61-051          | 0,468             | 1,524             | 4,123             | 6,1                                 | 350                           |
| 2001 | 61-052          | Sigmaringen              |            | SIG                  | 580                            | 790                           | 685                              | 3,2           | 61-052          | 0,387             | 0,848             | 0,569             | 1,8                                 | 685                           |
| 2001 | 61-053          | Sigmaringen              |            | SIG                  | 590                            | 790                           | 690                              | 10,8          | 61-053          | 2,614             | 5,136             | 2,849             | 10,6                                | 690                           |
| 2001 | 61-055          | Neufra                   |            | SIG                  | 650                            | 870                           | 761                              | 4,1           | 61-055          | 0,449             | 1,376             | 1,197             | 3,0                                 | 761                           |
| 2001 | 61-056          | Erkenbrechtsweiler       |            | ES                   | 650                            | 871                           | 760                              | 4,8           | 61-056          | 0,671             | 2,352             | 2,094             | 5,1                                 | 760                           |
| 2001 | 61-057          | Weilheim                 | F          | ES                   | 350                            | 806                           | 578                              | 3,4           | 61-057          | 0,522             | 1,188             | 1,236             | 2,9                                 | 795                           |
| 2001 | 61-058          | Albstadt                 |            | BL                   | 800                            | 980                           | 890                              | 7,8           | 61-058          | 0,496             | 0,818             | 1,458             | 2,8                                 | 890                           |
| 2001 | 61-059          | Veringenstadt            |            | SIG                  | 610                            | 810                           | 710                              | 5,2           | 61-059          | 0,657             | 0,967             | 2,199             | 3,8                                 | 710                           |
| 2001 | 61-060          | Hettingen                | F          | SIG                  | 630                            | 810                           | 720                              | 7,8           | 61-060          | 1,128             | 4,652             | 3,115             | 8,9                                 | 720                           |
| 2001 | 61-061          | Nusslingen               |            | BL                   | 720                            | 950                           | 835                              | 54,8          | 61-061          | 1,161             | 3,258             | 2,783             | 7,2                                 | 835                           |
| 2001 | 61-062          | Schelklingen             |            | UL                   | 520                            | 780                           | 650                              | 12,4          | 61-062          | 0,752             | 2,61              | 2,222             | 5,6                                 | 612                           |
| 2001 | 61-150          | Lenningen                |            | ES                   | 410                            | 750                           | 580                              | 10,2          | 61-150          | 1,808             | 1,297             | 2,012             | 5,1                                 | 580                           |
| 2001 | 61-150          | Lenningen                |            | ES                   | 410                            | 750                           | 580                              | 23,6          | 61-150          | 1,7               | 4,766             | 2,862             | 9,3                                 | 580                           |
| 2002 | 61-002          | Lenningen                |            | ES                   | 500                            | 770                           | 635                              | 19,9          | 61-002          | 3,1789            | 8,5606            | 4,7517            | 16,5                                | 635                           |
| 2002 | 61-009          | Neuffen                  | F          | RT                   | 400                            | 750                           | 575                              | 19,6          | 61-009          | 5,7383            | 4,6650            | 2,772             | 13,2                                | 575                           |
| 2002 | 61-012          | Bad Urach                |            | RT                   | 440                            | 830                           | 635                              | 17,9          | 61-012          | 0,8779            | 1,5816            | 1,5735            | 4,0                                 | 635                           |
| 2002 | 61-012          | Bad Urach                |            | RT                   | 440                            | 830                           | 635                              | 19,2          | 61-012          | 1,4189            | 3,4289            | 1,9225            | 6,8                                 | 635                           |
| 2002 | 61-036          | Aalen                    |            | AA                   | 377                            | 760                           | 569                              | 12,8          | 61-036          | 0,8780            | 1,5620            | 1,5730            | 4,0                                 | 569                           |
| 2002 | 61-037          | Geislingen a.d. Steige   |            | GP                   | 420                            | 700                           | 560                              | 19,3          | 61-037          | 7,0000            | 9,9100            | 7,8530            | 24,8                                | 560                           |
| 2002 | 61-039          | Schelklingen             | F          | UL                   | 530                            | 730                           | 630                              | 13,5          | 61-039          | 1,3060            | 4,3890            | 2,7680            | 8,5                                 | 590                           |
| 2002 | 61-044          | Zimmern ob Rotweil       | B          | RW                   | 590                            | 720                           | 655                              | 20,9          | 61-044          | 0,4220            | 1,3872            | 1,0982            | 2,9                                 | 655                           |
| 2002 | 61-079          | Geislingen an der Steige |            | GP                   | 430                            | 740                           | 585                              | 48,5          | 61-079          | 3,5620            | 9,8420            | 7,4830            | 20,9                                | 585                           |
| 2002 | 61-101          | Immendingen              |            | TUT                  | 660                            | 870                           | 765                              | 19,8          | 61-101          | 0,1948            | 0,5659            | 0,3351            | 1,1                                 | 765                           |
| 2002 | 61-122          | Eberbach                 |            | HD                   | 130                            | 630                           | 380                              | 19,6          | 61-122          | 1,1261            | 4,5470            | 4,1648            | 9,8                                 | 380                           |
| 2002 | 61-141          | Euffingen im Gäu         |            | FDS                  | 370                            | 540                           | 455                              | 17,8          | 61-141          | 1,8323            | 4,1445            | 1,2800            | 7,3                                 | 530                           |
| 2002 | 61-145          | Elzach                   | F          | EM                   | 340                            | 910                           | 625                              | 28,2          | 61-145          | 0,8880            | 3,8510            | 3,0490            | 7,8                                 | 600                           |
| 2002 | 61-153          | Esslingen an N.          | G          | ES                   | 240                            | 510                           | 375                              | 16,6          | 61-153          | 1,0530            | 2,7769            | 2,1297            | 6,0                                 | 260                           |
| 2002 | 61-154          | Pforzheim                |            | PF                   | 310                            | 540                           | 425                              | 19,6          | 61-154          | 0,7688            | 2,9544            | 2,0266            | 5,7                                 | 425                           |
| 2002 | 61-154          | Pforzheim                |            | PF                   | 310                            | 540                           | 425                              | 19,7          | 61-154          | 4,5057            | 14,8948           | 9,7315            | 29,1                                | 425                           |
| 2002 | 61-154          | Pforzheim                |            | PF                   | 310                            | 540                           | 425                              | 18,9          | 61-154          | 0,5175            | 1,8240            | 1,3077            | 3,6                                 | 425                           |
| 2002 | 61-155          | Herrenberg               |            | BB                   | 480                            | 780                           | 630                              | 15,5          | 61-155          | 0,7195            | 8,8125            | 32,7              | 485                                 | 630                           |
| 2002 | 61-157          | Engen                    | B          | KN                   | 520                            | 830                           | 675                              | 20,2          | 61-157          | 1,2782            | 3,4591            | 2,3903            | 7,1                                 | 570                           |
| 2002 | 61-159          | Tutlingen                |            | TUT                  | 630                            | 890                           | 760                              | 18,5          | 61-159          | 0,8289            | 2,0796            | 1,2892            | 4,2                                 | 760                           |
| 2002 | 61-159          | Tutlingen                |            | TUT                  | 630                            | 890                           | 760                              | 22,1          | 61-159          | 0,8876            | 3,8512            | 3,0495            | 7,8                                 | 760                           |
| 2002 | 61-160          | Pfaffenlofen             |            | HN                   | 200                            | 450                           | 325                              | 12,5          | 61-160          | 1,3057            | 4,3894            | 2,7679            | 8,5                                 | 325                           |
| 2002 | 61-161          | Blaustein-Dietingen      |            | UL                   | 490                            | 710                           | 600                              | 14,7          | 61-161          | 1,4190            | 3,4290            | 1,9220            | 6,8                                 | 600                           |
| 2002 | 61-161          | Blaustein-Dietingen      |            | UL                   | 490                            | 710                           | 600                              | 12,6          | 61-161          | 0,9150            | 2,6370            | 1,7370            | 5,3                                 | 600                           |
| 2002 | 61-162          | Blaustein-Bernaringen    |            | UL                   | 500                            | 690                           | 595                              | 30,9          | 61-162          | 2,9520            | 5,8900            | 3,9920            | 12,8                                | 600                           |
| 2003 | 61-005          | Neuffen                  | F          | ES                   | 400                            | 750                           | 575                              | 5,0           | 61-005          | 1,089             | 3,018             | 2,158             | 6,3                                 | 630                           |
| 2003 | 61-006          | Neckargemünd             |            | HD                   | 100                            | 570                           | 335                              | 2,3           | 61-006          | 0,493             | 1,002             | 0,745             | 2,2                                 | 180                           |
| 2003 | 61-006          | Neckargemünd             |            | HD                   | 100                            | 570                           | 335                              | 5,6           | 61-006          | 1,172             | 2,244             | 1,589             | 5,0                                 | 180                           |
| 2003 | 61-017          | Götenbach                | F          | ES                   | 540                            | 970                           | 755                              | 4,5           | 61-017          | 0,45              | 1,136             | 0,956             | 2,5                                 | 755                           |
| 2003 | 61-018          | Eberbach                 | F          | MOS                  | 130                            | 500                           | 315                              | 7,7           | 61-018          | 2,521             | 5,114             | 4,023             | 11,7                                | 315                           |
| 2003 | 61-020          | Widdern                  | B          | HN                   | 180                            | 330                           | 255                              | 11,1          | 61-020          | 1,376             | 2,841             | 1,833             | 6,0                                 | 250                           |
| 2003 | 61-037          | Geislingen a.d. Steige   |            | GP                   | 420                            | 700                           | 561                              | 4,0           | 61-037          | 1,452             | 3,393             | 3,289             | 8,1                                 | 561                           |
| 2003 | 61-039          | Schelklingen             | F          | UL                   | 530                            | 730                           | 630                              | 2,5           | 61-039          | 0,749             | 1,690             | 1,452             | 3,9                                 | 590                           |
| 2003 | 61-067          | Bingen                   |            | SIG                  | 580                            | 780                           | 680                              | 3,3           | 61-067          | 0,576             | 1,25              | 0,78              | 2,7                                 | 630                           |
| 2003 | 61-101          | Immendingen              |            | TUT                  | 660                            | 870                           | 765                              | 22,4          | 61-101          | 4,084             | 7,836             | 4,195             | 16,1                                | 765                           |
| 2003 | 61-101          | Immendingen              |            | TUT                  | 660                            | 870                           | 765                              | 14,0          | 61-101          | 2,678             | 5,148             | 2,759             | 10,6                                | 765                           |
| 2003 | 61-153          | Esslingen an N.          | G          | ES                   | 240                            | 510                           | 375                              | 5,0           | 61-153          | 1,897             | 3,693             | 2,680             | 8,3                                 | 260                           |
| 2003 | 61-158          | Dettingen                |            | RW                   | 570                            | 740                           | 655                              | 5,0           | 61-158          | 1,967             | 2,967             | 1,459             | 6,4                                 | 655                           |
| 2003 | 61-163          | Stuttgart                | G          | S                    | 210                            | 380                           | 285                              | 7,0           | 61-163          | 1,668             | 3,239             | 7,1               | 19                                  | 285                           |
| 2003 | 61-165          | Haigerloch               |            | BL                   | 430                            | 510                           | 470                              | 4,2           | 61-165          | 0,777             | 1,655             | 1,233             | 3,7                                 | 470                           |
| 2003 | 61-165          | Haigerloch               |            | BL                   | 430                            | 510                           | 470                              | 7,2           | 61-165          | 1,390             | 2,982             | 2,427             | 6,8                                 | 470                           |
| 2003 | 61-166          | Hechingen                |            | BL                   | 500                            | 960                           | 730                              | 6,6           | 61-166          | 0,788             | 1,655             | 1,457             | 3,9                                 | 730                           |
| 2003 | 61-167          | Zell im Wiesental        |            | LO                   | 410                            | 1080                          | 745                              | 7,0           | 61-167          | 4,268             | 7,037             | 6,582             | 17,9                                | 745                           |
| 2003 | 61-169          | Schwaningen              |            | OG                   | 90                             | 120                           | 105                              | 6,15          | 61-169          | 5,313             | 4,172             | 12,1              | 105                                 | 120                           |
| 2003 | 61-169          | Haigerach                |            | OG                   | 270                            | 880                           | 575                              | 3,8           | 61-169          | 1,489             | 3,108             | 2,228             | 6,8                                 | 575                           |
| 2003 | 61-169          | Haigerach                |            | OG                   | 270                            | 880                           | 575                              | 3,8           | 61-169          | 1,471             | 3,321             | 2,398             | 7,2                                 | 575                           |
| 2003 | 61-170          | St. Märgen               | F          | FR                   | 530                            | 1040                          | 785                              | 10,0          | 61-170          | 1,773             | 2,242             | 1,792             | 5,8                                 | 785                           |
| 2004 | 61-036          | Aalen                    |            | AA                   | 377                            | 760                           | 569                              | 14,9          | 61-036          | 0,543             | 0,983             | 0,921             | 2,4                                 | 569                           |
| 2004 | 61-036          | Aalen                    |            | AA                   | 377                            | 760                           | 569                              | 25,6          | 61-036          | 2,424             | 4,743             | 4,883             | 12,0                                | 569                           |
| 2004 | 61-039          | Blaubeuren               |            | UL                   | 500                            | 700                           | 600                              | 21,5          | 61-039          | 0,603             | 1,632             | 1,237             | 3,5                                 | 600                           |
| 2004 | 61-057          | Weilheim/Teck            | F          | ES                   | 350                            | 806                           | 578                              | 20,5          | 61-057          | 0,333             | 0,568             | 0,528             | 1,4                                 | 795                           |
| 2004 | 61-057          | Weilheim/Teck            | F          | ES                   | 350                            | 806                           | 578                              | 20,2          | 61-057          | 0,268             | 0,516             | 0,474             | 1,3                                 | 795                           |
| 2004 | 61-060          | Hettingen                | F          | SIG                  | 630                            | 810                           | 720                              | 19,0          | 61-060          | 0,515             | 1,134             | 0,805             | 2,5                                 | 720                           |
| 2004 | 61-060          | Hettingen                | F          | SIG                  | 630                            | 810                           | 720                              | 18,2          | 61-060          | 0,415             | 0,935             | 0,709             | 2,1                                 | 720                           |
| 2004 | 61-060          |                          |            |                      |                                |                               |                                  |               |                 |                   |                   |                   |                                     |                               |
