# Supplementary material
Source: publisher figshare collection journal article supplement (https://tandf.figshare.com/articles/dataset/_/1632781)
Supplement: Supplementary file 2 [file 2]

Peregrine Falcon Egg Pollutants  
Mirror Stockholm POPs List Including Methyl Mercury  
Simon Schwarz<sup>1</sup>, Anthony Rackstraw<sup>2</sup>, Peter A. Behnisch<sup>3</sup>, Abraham Brouwer<sup>4</sup>, Heinz-R. Köhne<sup>5</sup>, Alexander Kutz<sup>6</sup>, Thomas Kuballa<sup>7</sup>, Rainer Malisch<sup>8</sup>, Frank Neugebauer<sup>9</sup>, Friedrich Schilling<sup>9</sup>, Daniel Schmidt<sup>8</sup>, K. Theo von der Trenck<sup>8</sup>  
Online Table 1A: List of All Aeries

| Jahr | Standort-nummer | Gemeinde                 | Brut-platz | Landkreis/Stadtkreis | Höhenbereich Unter-grenze [m] | Höhenbereich Ober-grenze [m] | Höhe über NN Bereichs-mittelwert [m] | DDE [µg/g TS] | Standort-nummer | PCB-138 [µg/g TS] | PCB-153 [µg/g TS] | PCB-180 [µg/g TS] | Summe PCB (138, 153, 180) [µg/g TS] | Mittel-wert DDE [µg/g TS] | Mw Summe PCB <sub>1</sub> [µg/g TS] |
|------|-----------------|--------------------------|------------|----------------------|-------------------------------|------------------------------|--------------------------------------|---------------|-----------------|-------------------|-------------------|-------------------|-------------------------------------|---------------------------|-------------------------------------|
| 2001 | 61-009          | Ostildern                | B          | ES                   | 290                           | 350                          | 320                                  | 10,8          | 61-009          | 4.301             | 6.365             | 3.873             | 14,5                                | 15,7                      | 9,8                                 |
| 2001 | 61-013          | Oberried (Kirchzarten)   | F          | FR                   | 430                           | 1280                         | 855                                  | 12,2          | 61-013          | 1.548             | 3.884             | 2.548             | 7,8                                 |                           | §§§                                 |
| 2001 | 61-018          | Eberbach                 | F          | MOS                  | 130                           | 315                          | 215                                  | 5,4           | 61-018          | 1.149             | 2.732             | 1.971             | 5,9                                 |                           | §§§                                 |
| 2001 | 61-031          | Breitnau                 | F          | FR                   | 940                           | 1490                         | 1215                                 | 14,2          | 61-031          | 6.098             | 6.253             | 3.551             | 12,5                                |                           | §§§                                 |
| 2001 | 61-031          | Breitnau                 | FR         | 940                  | 1490                          | 1215                         | 16,6                                 | 61-031        | 3.381           | 7.809             | 4.421             | 15,6              |                                     | §§§                       |                                     |
| 2001 | 61-035          | Schwäbisch Hall          | FR         | SHA                  | 270                           | 510                          | 390                                  | 3,2           | 61-035          | 0.343             | 0.638             | 0.879             | 1,9                                 |                           | §§§                                 |
| 2001 | 61-035          | Schwäbisch Hall          | FR         | SHA                  | 270                           | 510                          | 390                                  | 14,2          | 61-035          | 1.211             | 2.975             | 4.599             | 8,4                                 |                           | §§§                                 |
| 2001 | 61-036          | Aalen                    | AA         | 377                  | 760                           | 569                          | 4,7                                  | 61-036        | 1.181           | 1.168             | 1.473             | 3,8               |                                     | §§§                       |                                     |
| 2001 | 61-039          | Scheklingen              | F          | UL                   | 530                           | 730                          | 630                                  | 2,1           | 61-039          | 0.372             | 1.063             | 1.239             | 2,7                                 |                           | §§§                                 |
| 2001 | 61-039          | Scheklingen              | F          | UL                   | 530                           | 730                          | 630                                  | 1,5           | 61-039          | 0.234             | 0.725             | 0.764             | 1,7                                 |                           | §§§                                 |
| 2001 | 61-039          | Scheklingen              | F          | UL                   | 530                           | 730                          | 630                                  | 1,3           | 61-039          | 0.485             | 0.571             | 0.701             | 1,8                                 |                           | §§§                                 |
| 2001 | 61-040          | Freiburg                 | FR         | 320                  | 1280                          | 800                          | 10,3                                 | 61-040        | 0.797           | 1.399             | 0.86              | 3,1               |                                     | §§§                       |                                     |
| 2001 | 61-040          | Freiburg                 | FR         | 320                  | 1280                          | 800                          | 8,8                                  | 61-040        | 0.683           | 1.187             | 0.893             | 2,6               |                                     | §§§                       |                                     |
| 2001 | 61-040          | Freiburg                 | FR         | 320                  | 1280                          | 800                          | 37,5                                 | 61-040        | 3.297           | 6.048             | 3.628             | 13,0              |                                     | §§§                       |                                     |
| 2001 | 61-041          | Philipsburg              | G          | KA                   | 95                            | 110                          | 103                                  | 23,5          | 61-041          | 6.863             | 9.742             | 1.119             | 17,7                                |                           | §§§                                 |
| 2001 | 61-042          | Neckarwehrt              | LB         | 170                  | 390                           | 280                          | 18,8                                 | 61-042        | 5.104           | 8.425             | 0.033             | 13,6              |                                     | §§§                       |                                     |
| 2001 | 61-044          | Zimmern ob Rotweil       | B          | RW                   | 590                           | 655                          | 620                                  | 9,4           | 61-044          | 3.441             | 1.808             | 7,3               |                                     |                           | §§§                                 |
| 2001 | 61-045          | Rottweil-Villingendorf   | B          | RW                   | 510                           | 730                          | 620                                  | 7,0           | 61-045          | 0.701             | 2.026             | 1.597             | 4,3                                 |                           | §§§                                 |
| 2001 | 61-045          | Rottweil-Villingendorf   | B          | RW                   | 510                           | 730                          | 620                                  | 11,2          | 61-045          | 0.876             | 2.446             | 1.736             | 5,1                                 |                           | §§§                                 |
| 2001 | 61-048          | Badenweiler              | F          | FR                   | 300                           | 1170                         | 735                                  | 23,3          | 61-048          | 2.293             | 7.588             | 6.618             | 16,5                                |                           | §§§                                 |
| 2001 | 61-048          | Badenweiler              | F          | FR                   | 300                           | 1170                         | 735                                  | 23,6          | 61-048          | 2.188             | 8.821             | 6.398             | 17,4                                |                           | §§§                                 |
| 2001 | 61-050          | Feldberg                 | F          | FR                   | 110                           | 1490                         | 800                                  | 30,5          | 61-050          | 2.144             | 6.793             | 4.451             | 13,4                                |                           | §§§                                 |
| 2001 | 61-050          | Feldberg                 | F          | FR                   | 110                           | 1490                         | 800                                  | 12,2          | 61-050          | 1.458             | 3.684             | 2.548             | 7,7                                 |                           | §§§                                 |
| 2001 | 61-050          | Feldberg                 | F          | FR                   | 110                           | 1490                         | 800                                  | 10,8          | 61-050          | 0.498             | 0.683             | 2.321             | 6,8                                 |                           | §§§                                 |
| 2001 | 61-051          | Baden-Baden              | BAD        | 130                  | 570                           | 350                          | 4,9                                  | 61-051        | 4.469           | 5.504             | 4.123             | 14,1              |                                     | §§§                       |                                     |
| 2001 | 61-052          | Sigmaringen              | SIG        | 580                  | 790                           | 685                          | 3,2                                  | 61-052        | 0.387           | 0.848             | 0.569             | 1,8               |                                     | §§§                       |                                     |
| 2001 | 61-053          | Sigmaringen              | SIG        | 590                  | 790                           | 690                          | 10,8                                 | 61-053        | 2.614           | 5.136             | 2.849             | 10,6              |                                     | §§§                       |                                     |
| 2001 | 61-055          | Neudorf                  | SIG        | 650                  | 870                           | 761                          | 11                                   | 61-055        | 0.449           | 1.375             | 1.197             | 4,0               |                                     | §§§                       |                                     |
| 2001 | 61-056          | Erkenbrackswiller        | ES         | 350                  | 871                           | 760                          | 4,8                                  | 61-056        | 0.671           | 2.832             | 2.094             | 5,1               |                                     | §§§                       |                                     |
| 2001 | 61-057          | Weilheim                 | F          | ES                   | 350                           | 806                          | 578                                  | 3,4           | 61-057          | 0.522             | 1.188             | 1.236             | 2,9                                 |                           | §§§                                 |
| 2001 | 61-058          | Albstadt                 | BL         | 800                  | 980                           | 890                          | 7,8                                  | 61-058        | 0.496           | 0.818             | 1.458             | 2,8               |                                     | §§§                       |                                     |
| 2001 | 61-059          | Vörsingen                | SIG        | 810                  | 810                           | 710                          | 5,2                                  | 61-059        | 0.857           | 1.567             | 2.199             | 3,8               |                                     | §§§                       |                                     |
| 2001 | 61-060          | Hettingen                | F          | SIG                  | 630                           | 810                          | 720                                  | 7,8           | 61-060          | 1.128             | 4.652             | 3.115             | 7,9                                 |                           | §§§                                 |
| 2001 | 61-061          | Nusplingen               | BL         | 720                  | 950                           | 835                          | 54,8                                 | 61-061        | 1.161           | 3.258             | 2.783             | 8,2               |                                     | §§§                       |                                     |
| 2001 | 61-062          | Scheklingen              | UL         | 520                  | 650                           | 580                          | 12,4                                 | 61-062        | 0.720           | 2.61              | 2.222             | 5,6               |                                     | §§§                       |                                     |
| 2001 | 61-150          | Lenningen                | ES         | 410                  | 750                           | 580                          | 10,2                                 | 61-150        | 1.808           | 1.297             | 2.012             | 5,1               |                                     | §§§                       |                                     |
| 2001 | 61-047          | Wörth am Rhein           | G          | GER                  | 410                           | 750                          | 580                                  | 23,6          | 61-047          | 1.7               | 4.766             | 2.662             | 9,3                                 |                           | §§§                                 |
| 2001 | 61-047          | Wörth am Rhein           | G          | GER                  | 410                           | 750                          | 580                                  | 11,8          | 61-047          | 10.156            | 27.527            | 25.145            | 62,9                                |                           | §§§                                 |
| 2001 | 61-151          | Ludwigshafen             | G          | LU                   | 90                            | 100                          | 95                                   | 38,0          | 61-151          | 7.804             | 10.875            | 10.173            | 28,9                                |                           | §§§                                 |
| 2001 | 61-151          | Ludwigshafen             | G          | LU                   | 90                            | 100                          | 95                                   | 27,1          | 61-151          | 12.498            | 20.752            | 14.007            | 47,3                                |                           | §§§                                 |
| 2001 | 61-151          | Ludwigshafen             | G          | LU                   | 90                            | 100                          | 95                                   | 24,6          | 61-151          | 10.135            | 17.534            | 12.465            | 40,1                                |                           | §§§                                 |
| 2002 | 61-002          | Lenningen                | G          | ES                   | 500                           | 770                          | 635                                  | 19,9          | 61-002          | 3.1789            | 8.5606            | 4.7517            | 16,5                                |                           | §§§                                 |
| 2002 | 61-005          | Neuffen                  | F          | ES                   | 400                           | 730                          | 575                                  | 19,6          | 61-005          | 2.7710            | 5.7383            | 4.6650            | 13,2                                |                           | §§§                                 |
| 2002 | 61-012          | Bad Urach                | RT         | 440                  | 830                           | 635                          | 17,9                                 | 61-012        | 0.8779          | 1.5816            | 1.5735            | 4,0               |                                     | §§§                       |                                     |
| 2002 | 61-012          | Bad Urach                | RT         | 440                  | 830                           | 635                          | 19,2                                 | 61-012        | 1.4189          | 3.4389            | 1.8025            | 6,8               |                                     | §§§                       |                                     |
| 2002 | 61-023          | Mannheim                 | G          | MA                   | 100                           | 100                          | 100                                  | 10,2          | 61-023          | 2.0911            | 5.7545            | 2.5680            | 10,7                                |                           | §§§                                 |
| 2002 | 61-023          | Mannheim                 | G          | MA                   | 100                           | 100                          | 100                                  | 12,8          | 61-023          | 24.3527           | 45.6306           | 29.7546           | 28,4                                |                           | §§§                                 |
| 2002 | 61-036          | Aalen                    | AA         | 377                  | 760                           | 569                          | 12,8                                 | 61-036        | 0.8760          | 1.5620            | 1.5730            | 4,2               |                                     | §§§                       |                                     |
| 2002 | 61-037          | Geislingen a.d. Steige   | GP         | 420                  | 700                           | 560                          | 19,3                                 | 61-037        | 7.0000          | 9.9100            | 7.8530            | 24,8              |                                     | §§§                       |                                     |
| 2002 | 61-039          | Scheklingen              | F          | UL                   | 530                           | 730                          | 630                                  | 13,5          | 61-039          | 1.3060            | 4.3890            | 2.7680            | 8,5                                 |                           | §§§                                 |
| 2002 | 61-044          | Zimmern ob Rotweil       | B          | RW                   | 590                           | 655                          | 620                                  | 9,4           | 61-044          | 4.220             | 2.3872            | 1.0992            | 7,9                                 |                           | §§§                                 |
| 2002 | 61-079          | Geislingen an der Steige | GP         | 430                  | 740                           | 585                          | 48,5                                 | 61-079        | 3.5620          | 9.8420            | 7.4830            | 20,9              |                                     | §§§                       |                                     |
| 2002 | 61-101          | Immendingen              | TUT        | 660                  | 870                           | 765                          | 19,8                                 | 61-101        | 0.1948          | 0.5659            | 0.3351            | 1,1               |                                     | §§§                       |                                     |
| 2002 | 61-122          | Eberbach                 | HD         | 330                  | 380                           | 350                          | 1,5                                  | 61-122        | 0.1261          | 1.5470            | 1.1448            | 9,8               |                                     | §§§                       |                                     |
| 2002 | 61-141          | Eutingen im Gäu          | FDS        | 370                  | 540                           | 455                          | 17,8                                 | 61-141        | 1.8323          | 4.1445            | 1.2800            | 7,3               |                                     | §§§                       |                                     |
| 2002 | 61-145          | Elzach                   | F          | EM                   | 340                           | 910                          | 625                                  | 26,2          | 61-145          | 0.8880            | 3.8510            | 3.0490            | 7,8                                 |                           | §§§                                 |
| 2002 | 61-153          | Esslingen an N.          | G          | ES                   | 240                           | 510                          | 375                                  | 11,3          | 61-153          | 0.0530            | 2.7789            | 2.1207            | 6,5                                 |                           | §§§                                 |
| 2002 | 61-154          | Plozheim                 | PF         | 310                  | 540                           | 425                          | 19,6                                 | 61-154        | 0.7688          | 2.9544            | 2.0266            | 5,7               |                                     | §§§                       |                                     |
| 2002 | 61-154          | Plozheim                 | PF         | 310                  | 540                           | 425                          | 19,7                                 | 61-154        | 4.5057          | 14.8948           | 9.7315            | 29,1              |                                     | §§§                       |                                     |
| 2002 | 61-154          | Plozheim                 | PF         | 310                  | 540                           | 425                          | 19,6                                 | 61-154        | 0.540           | 0.5175            | 1.3077            | 3,3               |                                     | §§§                       |                                     |
| 2002 | 61-155          | Hennersberg              | BB         | 400                  | 570                           | 485                          | 15,5                                 | 61-155        | 8.7195          | 15.1300           | 8.8125            | 32,7              |                                     | §§§                       |                                     |
| 2002 | 61-157          | Engen                    | B          | KN                   | 520                           | 830                          | 675                                  | 20,2          | 61-157          | 1.2782            | 3.4591            | 2.3903            | 7,1                                 |                           | §§§                                 |
| 2002 | 61-159          | Tutlingen                | F          | TUT                  | 630                           | 890                          | 760                                  | 18,5          | 61-159          | 0.8289            | 2.0796            | 1.2892            | 4,2                                 |                           | §§§                                 |
| 2002 | 61-159          | Tutlingen                | F          | TUT                  | 630                           | 890                          | 760                                  | 22,1          | 61-159          | 0.8875            | 3.8512            | 3.0465            | 7,8                                 |                           | §§§                                 |
| 2002 | 61-160          | Pfaffenhofen             | HN         | 200                  | 450                           | 325                          | 12,5                                 | 61-160        | 1.3057          | 4.3894            | 2.7679            | 8,5               |                                     | §§§                       |                                     |
| 2002 | 61-161          | Blaustein-Deilingen      | UL         | 490                  | 710                           | 600                          | 14,7                                 | 61-161        | 1.4190          | 3.4290            | 1.9220            | 6,8               |                                     | §§§                       |                                     |
| 2002 | 61-161          | Blaustein-Deilingen      | UL         | 490                  | 710                           | 600                          | 12,6                                 | 61-161        | 0.9150          | 2.8370            | 1.7370            | 5,3               |                                     | §§§                       |                                     |
| 2002 | 61-162          | Blaustein-Bernaringen    | UL         | 500                  | 690                           | 595                          | 30,9                                 | 61-162        | 2.9520          | 8.8900            | 3.9920            | 12,8              |                                     | §§§                       |                                     |
| 2003 | 61-005          | Neuffen                  | F          | ES                   | 400                           | 750                          | 575                                  | 5,0           | 61-005          | 1.089             | 3.018             | 2.158             | 6,3                                 |                           | §§§                                 |
| 2003 | 61-006          | Neckargemünd             | HD         | 100                  | 335                           | 215                          | 2,3                                  | 61-006        | 0.493           | 1.002             | 0.745             | 2,2               |                                     | §§§                       |                                     |
| 2003 | 61-006          | Neckargemünd             | HD         | 100                  | 335                           | 215                          | 5,6                                  | 61-006        | 1.172           | 2.244             | 1.589             | 5,0               |                                     | §§§                       |                                     |
| 2003 | 61-007          | Marbach am Neckar        | G          | LB                   | 190                           | 370                          | 280                                  | 15,0          | 61-007          | 2.204             | 4.365             | 2.871             | 9,4                                 |                           | §§§                                 |
| 2003 | 61-017          | Gütersbach               | F          | VS                   | 540                           | 970                          | 755                                  | 4,5           | 61-017          | 0.451             | 1.136             | 0.956             | 2,5                                 |                           | §§§                                 |
| 2003 | 61-018          | Eberbach                 | F          | MOS                  | 130                           | 315                          | 215                                  | 7,7           | 61-018          | 2.521             | 5.114             | 4.023             | 11,7                                |                           | §§§                                 |
| 2003 | 61-020          | Widdern                  | B          | HN                   | 180                           | 330                          | 255                                  | 11,1          | 61-020          | 1.378             | 2.841             | 1.833             | 6,0                                 |                           | §§§                                 |
| 2003 | 61-037          | Geislingen a.d. Steige   | GP         | 420                  | 700                           | 560                          | 11,0                                 | 61-037        | 1.452           | 3.393             | 3.289             | 8,1               |                                     | §§§                       |                                     |
| 2003 | 61-039          | Scheklingen              | F          | UL                   | 530                           | 730                          | 630                                  | 6,5           | 61-039          | 0.748             | 1.690             | 1.452             | 3,8                                 |                           | §§§                                 |
| 2003 | 61-067          | Bingen                   | F          | SIG                  | 580                           | 780                          | 680                                  | 3,3           | 61-067          | 0.576             | 1.251             | 0.894             | 2,7                                 |                           | §§§                                 |
| 2003 | 61-101          | Immendingen              | TUT        | 660                  | 870                           | 765                          | 22,4                                 | 61-101        | 4.084           | 7.836             | 4.195             | 16,1              |                                     | §§§                       |                                     |
| 2003 | 61-101          | Immendingen              | TUT        | 660                  | 870                           | 765                          | 14,0                                 | 61-101        | 0.678           | 5.148             | 2.759             | 10,6              |                                     | §§§                       |                                     |
| 2003 | 61-153          | Esslingen an N.          | G          | ES                   | 240                           | 510                          | 375                                  | 5,0           | 61-153          | 1.897             | 3.693             | 2.680             | 8,3                                 |                           | §§§                                 |
| 2003 | 61-158          | Deilingen                | RT         | 570                  | 740                           | 655                          | 5,0                                  | 61-158        | 1.967           | 2.967             | 1.459             | 6,4               |                                     | §§§                       |                                     |
| 2003 | 61-163          | Albstadt                 | BL         | 800                  | 970                           | 885                          | 11,8                                 | 61-163        | 0.945           | 4.348             | 4.281             | 9,3               |                                     | §§§                       |                                     |
| 2003 | 61-164          | Stuttart                 | G          | S                    | 210                           | 360                          | 285                                  | 7,0           | 61-164          | 1.666             | 3.239             | 2.193             | 7,1                                 |                           | §§§                                 |
| 2003 | 61-165          | Haigerloch               | BL         | 430                  | 510                           | 470                          | 4,2                                  | 61-165        | 0.777           | 1.655             | 1.233             | 3,7               |                                     | §§§                       |                                     |
| 2003 | 61-165          | Haigerloch               | BL         | 430                  | 510                           | 470                          | 7,2                                  | 61-165        | 1.390           | 2.962             | 2.427             | 6,8               |                                     | §§§                       |                                     |
| 2003 | 61-166          | Hechingen                | BL         | 500                  | 730                           | 615                          | 6,8                                  | 61-166        | 0.788           | 1.655             | 1.457             | 3,9               |                                     | §§§                       |                                     |
| 2003 | 61-167          | Zell im Wiesental        | LO         | 410                  | 1080                          | 745                          | 7,0                                  | 61-167        | 4.268           |                   |                   |                   |                                     |                           |                                     |
